# Supplementary material for: Alterations in Oral [1-14C] 18:1n-9 Distribution in Lean Wild-Type and Genetically Obese (ob/ob) Mice
Source: PLoS One. 2015 Mar 31;10(3):e0122028. doi: 10.1371/journal.pone.0122028 (PMC4380473; doi:10.1371/journal.pone.0122028)
Supplement: S4 Table — (DOCX) [file pone.0122028.s006.docx]

S4 Table Percentage of 14C-label retention in each adipose depot from lean and obese mice

| Tissue | 4 | |  | 12 | |  | 24 | |  | 48 | |  | 96 | |  | 168 | |  |
| --- | --- | --- | --- | --- | --- | --- | --- | --- | --- | --- | --- | --- | --- | --- | --- | --- | --- | --- |
| Lean | Obese |  | Lean | Obese |  | Lean | Obese |  | Lean | Obese |  | Lean | Obese |  | Lean | Obese |  |
| SAT | 36.1 ± 5.0a | 51.2 ± 5.7a* |  | 27.6 ± 3.1b | 44.5 ± 4.7a* |  | 34.1 ± 2.6a | 50.7 ± 1.2a* |  | 30.9 ± 3.9ab | 50.1 ± 3.4a* |  | 26.7 ± 0.6b | 51.0 ± 3.9a* |  | 27.8 ± 2.8b | 40.3 ± 9.9a |  |
| VAT | 17.7 ± 1.1b | 25.9 ± 4.5b |  | 24.7 ± 5.5b | 25.3 ± 5.9b |  | 22.5 ± 0.9b | 24.8 ± 0.9b |  | 24.5 ± 3.6b | 23.5 ± 1.3b |  | 28.4 ± 1.5b | 26.6 ± 3.2b |  | 20.3 ± 1.2c | 28.6 ± 5.3b |  |
| PAT | 34.1 ± 3.6a* | 11.6 ± 1.6c |  | 40.9 ± 2.4a* | 16.4 ± 2.0b |  | 35.0 ± 2.1a* | 12.4 ± 0.3c |  | 38.7 ± 1.1a* | 15.5 ± 3.7bc |  | 38.1 ± 1.8a* | 11.8 ± 1.1c |  | 47.7 ± 3.6a* | 15.6 ± 2.0b |  |
| MAT | 12.2 ± 1.2b | 11.4 ± 0.1c* |  | 6.8 ± 1.2c | 13.7 ± 2.1b* |  | 8.4 ± 0.5c | 12.1 ± 0.5c* |  | 5.9 ± 0.7c | 10.9 ± 0.9c* |  | 6.8 ± 0.7c | 10.6 ± 1.7c |  | 4.2 ± 0.4d | 15.4 ± 2.7b* |  |

Data are presented as Mean ± SEM (n=3). Different letters indicates significant difference in same column at *P*<0.05. [Asterisk](javascript:void(0);) (*) indicates significant differences between lean and obese mice at that time point at *P*< 0.05. SAT: subcutaneous adipose tissue; VAT: visceral adipose tissue; PAT: perirenal adipose tissue; MAT: Mesenteric adipose tissue
